# Supplementary material for: Heritability of Subcortical Grey Matter Structures
Source: MDPI journal article supplement (doi:10.3390/medicina58111687), 2022-11-21
Supplement: s1 [file s1]

### CAT12 Analysis

*AIC: akaike information criteria, BIC: bayesian information criteria, -2LL: -2\*loglikelihood value, df: degree of freedom, DiffLL: the difference of the -2LL of the base model (ACE) and the reduced model in the given row (AE/CE/E), P value: p value of the likelihood ratio test, best fitting model is marked with a star (\*).*

| <b>TIV<br/>cm3</b> | <b>AIC</b> | <b>BIC</b> | <b>-2LL</b>                  | <b>df</b>                   | <b>DiffLL</b> | <b>P value</b> | <b>Results (95% CI)</b>                                               |
|--------------------|------------|------------|------------------------------|-----------------------------|---------------|----------------|-----------------------------------------------------------------------|
| ACE                | 1,466.164  | 1,457.102  | 1450.128                     | 7                           | Reference     | Reference      | A: 0.932 (0.894, 0.955)<br>C: 0 (0, 0.106)<br>E: 0.068 (0.045, 0.106) |
| AE*                | 1,463.628  | 1,456.106  | 1450.128                     | 6                           | 0             | 1              | A: 0.932 (0.894, 0.955)<br>C: 0<br>E: 0.068 (0.045, 0.106)            |
| CE                 | 1,497.725  | 1,490.203  | 1484.225                     | 6                           | -34.097       | 0              | A: 0<br>C: 0.759 (0.657, 0.846)<br>E: 0.241 (0.154, 0.343)            |
| E                  | 1,549.457  | 1,543.387  | 1538.405                     | 5                           | -88.277       | 0              | A: 0<br>C: 0<br>E: 1                                                  |
| SAT                | 1,472.571  | 1,458.303  | Rmz: 0.924<br>(0.881, 0.949) | Rdz: 0.501<br>(0.099, 0.72) |               |                |                                                                       |

| <b>Total GM<br/>cm3</b> | <b>AIC</b> | <b>BIC</b> | <b>-2LL</b>                  | <b>df</b>                     | <b>DiffLL</b> | <b>P value</b> | <b>Results (95% CI)</b>                                               |
|-------------------------|------------|------------|------------------------------|-------------------------------|---------------|----------------|-----------------------------------------------------------------------|
| ACE                     | 1,273.104  | 1,264.042  | 1257.068                     | 7                             | Reference     | Reference      | A: 0.925 (0.882, 0.956)<br>C: 0 (0, 0.118)<br>E: 0.075 (0.044, 0.118) |
| AE*                     | 1,270.568  | 1,263.046  | 1257.068                     | 6                             | 0             | 1              | A: 0.925 (0.882, 0.956)<br>C: 0<br>E: 0.075 (0.044, 0.118)            |
| CE                      | 1,309.797  | 1,302.275  | 1296.297                     | 6                             | -39.229       | 0              | A: 0<br>C: 0.67 (0.509, 0.765)<br>E: 0.33 (0.235, 0.491)              |
| E                       | 1,344.891  | 1,338.820  | 1333.838                     | 5                             | -76.77        | 0              | A: 0<br>C: 0<br>E: 1                                                  |
| SAT                     | 1,278.755  | 1,264.488  | Rmz: 0.912<br>(0.847, 0.941) | Rdz: 0.271<br>(-0.164, 0.586) |               |                |                                                                       |

| <b>Total WM<br/>cm3</b> | <b>AIC</b> | <b>BIC</b> | <b>-2LL</b>                  | <b>df</b>                    | <b>DiffLL</b> | <b>P value</b> | <b>Results (95% CI)</b>                                               |
|-------------------------|------------|------------|------------------------------|------------------------------|---------------|----------------|-----------------------------------------------------------------------|
| ACE                     | 1,275.221  | 1,266.159  | 1259.185                     | 7                            | Reference     | Reference      | A: 0.931 (0.892, 0.958)<br>C: 0 (0, 0.108)<br>E: 0.069 (0.042, 0.108) |
| AE*                     | 1,272.685  | 1,265.163  | 1259.185                     | 6                            | 0             | 1              | A: 0.931 (0.892, 0.958)<br>C: 0<br>E: 0.069 (0.042, 0.108)            |
| CE                      | 1,305.383  | 1,297.861  | 1291.883                     | 6                            | -32.698       | 0              | A: 0<br>C: 0.78 (0.685, 0.843)<br>E: 0.22 (0.157, 0.315)              |
| E                       | 1,361.916  | 1,355.845  | 1350.864                     | 5                            | -91.679       | 0              | A: 0<br>C: 0<br>E: 1                                                  |
| SAT                     | 1,282.982  | 1,268.715  | Rmz: 0.934<br>(0.896, 0.956) | Rdz: 0.414<br>(0.012, 0.671) |               |                |                                                                       |

| <b>Total CSF<br/>cm3</b> | <b>AIC</b> | <b>BIC</b> | <b>-2LL</b> | <b>df</b> | <b>DiffLL</b> | <b>P value</b> | <b>Results (95% CI)</b>                                                   |
|--------------------------|------------|------------|-------------|-----------|---------------|----------------|---------------------------------------------------------------------------|
| ACE                      | 1,335.221  | 1,326.159  | 1319.185    | 7         | Reference     | Reference      | A: 0.779 (0.301, 0.884)<br>C: 0.029 (0, 0.327)<br>E: 0.192 (0.114, 0.327) |
| AE*                      | 1,332.696  | 1,325.174  | 1319.196    | 6         | -0.011        | 0.916          | A: 0.809 (0.674, 0.886)<br>C: 0<br>E: 0.191 (0.114, 0.326)                |

|     |           |           |                              |                              |         |       |                                                            |
|-----|-----------|-----------|------------------------------|------------------------------|---------|-------|------------------------------------------------------------|
| CE  | 1,342.949 | 1,335.427 | 1329.449                     | 6                            | -10.264 | 0.001 | A: 0<br>C: 0.614 (0.435, 0.746)<br>E: 0.386 (0.254, 0.565) |
| E   | 1,370.255 | 1,364.184 | 1359.203                     | 5                            | -40.018 | 0     | A: 0<br>C: 0<br>E: 1                                       |
| SAT | 1,315.208 | 1,300.940 | Rmz: 0.665<br>(0.458, 0.801) | Rdz: 0.731<br>(0.493, 0.849) |         |       |                                                            |

| Right Accumbens cm3 | AIC      | BIC      | -2LL                        | df                           | DiffLL    | P value   | Results (95% CI)                                                      |
|---------------------|----------|----------|-----------------------------|------------------------------|-----------|-----------|-----------------------------------------------------------------------|
| ACE                 | -524.461 | -533.523 | -540.497                    | 7                            | Reference | Reference | A: 0.902 (0.576, 0.942)<br>C: 0 (0, 0.168)<br>E: 0.098 (0.058, 0.168) |
| AE*                 | -526.997 | -534.519 | -540.497                    | 6                            | 0         | 1         | A: 0.902 (0.855, 0.941)<br>C: 0<br>E: 0.098 (0.059, 0.145)            |
| CE                  | -498.013 | -505.535 | -511.513                    | 6                            | -28.985   | 0         | A: 0<br>C: 0.698 (0.547, 0.801)<br>E: 0.302 (0, 0.452)                |
| E                   | -458.369 | -464.440 | -469.421                    | 5                            | -71.076   | 0         | A: 0<br>C: 0<br>E: 1                                                  |
| SAT                 | -517.366 | -531.634 | Rmz: 0.898<br>(0.82, 0.943) | Rdz: 0.289<br>(-0.15, 0.635) |           |           |                                                                       |

| Left Accumbens cm3 | AIC      | BIC      | -2LL                         | df                            | DiffLL    | P value   | Results (95% CI)                                                      |
|--------------------|----------|----------|------------------------------|-------------------------------|-----------|-----------|-----------------------------------------------------------------------|
| ACE                | -462.532 | -471.594 | -478.568                     | 7                             | Reference | Reference | A: 0.908 (0.775, 0.947)<br>C: 0 (0, 0.167)<br>E: 0.092 (0.053, 0.167) |
| AE*                | -465.068 | -472.590 | -478.568                     | 6                             | 0         | 1         | A: 0.908 (0.833, 0.947)<br>C: 0<br>E: 0.092 (0.053, 0.167)            |
| CE                 | -429.242 | -436.764 | -442.742                     | 6                             | -35.826   | 0         | A: 0<br>C: 0.495 (0.286, 0.659)<br>E: 0.505 (0.341, 0.714)            |
| E                  | -413.995 | -420.066 | -425.048                     | 5                             | -53.52    | 0         | A: 0<br>C: 0<br>E: 1                                                  |
| SAT                | -470.663 | -484.931 | Rmz: 0.862<br>(0.761, 0.922) | Rdz: 0.111<br>(-0.332, 0.515) |           |           |                                                                       |

| Right Amygdala cm3 | AIC      | BIC      | -2LL                         | df                            | DiffLL    | P value   | Results (95% CI)                                                      |
|--------------------|----------|----------|------------------------------|-------------------------------|-----------|-----------|-----------------------------------------------------------------------|
| ACE                | -335.001 | -344.063 | -351.037                     | 7                             | Reference | Reference | A: 0.855 (0.353, 0.912)<br>C: 0 (0, 0.241)<br>E: 0.145 (0.088, 0.241) |
| AE*                | -337.537 | -345.059 | -351.037                     | 6                             | 0         | 1         | A: 0.855 (0.759, 0.912)<br>C: 0<br>E: 0.145 (0.088, 0.241)            |
| CE                 | -322.601 | -330.123 | -336.101                     | 6                             | -14.937   | 0         | A: 0<br>C: 0.723 (0.582, 0.822)<br>E: 0.277 (0.178, 0.418)            |
| E                  | -278.435 | -284.505 | -289.487                     | 5                             | -61.55    | 0         | A: 0<br>C: 0<br>E: 1                                                  |
| SAT                | -330.684 | -344.951 | Rmz: 0.873<br>(0.777, 0.929) | Rdz: 0.358<br>(-0.079, 0.683) |           |           |                                                                       |

| Left Amygdala cm3 | AIC      | BIC      | -2LL     | df | DiffLL    | P value   | Results (95% CI)                                                    |
|-------------------|----------|----------|----------|----|-----------|-----------|---------------------------------------------------------------------|
| ACE               | -283.247 | -292.309 | -299.284 | 7  | Reference | Reference | A: 0.754 (0.436, 0.856)<br>C: 0 (0, 0.42)<br>E: 0.246 (0.144, 0.42) |
| AE*               | -285.784 | -293.306 | -299.284 | 6  | 0         | 1         | A: 0.754 (0.579, 0.856)<br>C: 0                                     |

|     |          |          |                              |                               |         |   |                                                            |
|-----|----------|----------|------------------------------|-------------------------------|---------|---|------------------------------------------------------------|
|     |          |          |                              |                               |         |   | E: 0.246 (0.144, 0.421)                                    |
| CE  | -273.046 | -262.391 | -286.546                     | 6                             | -12.738 | 0 | A: 0<br>C: 0.512 (0.307, 0.673)<br>E: 0.488 (0.327, 0.693) |
| E   | -256.320 | -284.505 | -267.373                     | 5                             | -31.911 | 0 | A: 0<br>C: 0<br>E: 1                                       |
| SAT | -282.165 | -296.432 | Rmz: 0.737<br>(0.563, 0.849) | Rdz: 0.161<br>(-0.299, 0.563) |         |   |                                                            |

| Right Caudate<br>cm3 | AIC     | BIC     | -2LL                         | df                           | DiffLL    | P value   | Results (95% CI)                                                          |
|----------------------|---------|---------|------------------------------|------------------------------|-----------|-----------|---------------------------------------------------------------------------|
| ACE                  | 40.596  | 31.534  | 24.559                       | 7                            | Reference | Reference | A: 0.429 (0.099, 0.905)<br>C: 0.443 (0, 0.216)<br>E: 0.128 (0.077, 0.216) |
| AE*                  | 40.268  | 32.746  | 26.768                       | 6                            | -2.209    | 0.137     | A: 0.87 (0.786, 0.92)<br>C: 0<br>E: 0.13 (0.08, 0.214)                    |
| CE                   | 45.291  | 37.769  | 31.791                       | 6                            | -7.232    | 0.007     | A: 0<br>C: 0.804 (0.697, 0.876)<br>E: 0.196 (0.124, 0.303)                |
| E                    | 108.278 | 102.207 | 97.226                       | 5                            | -72.666   | 0         | A: 0<br>C: 0<br>E: 1                                                      |
| SAT                  | 48.189  | 33.922  | Rmz: 0.873<br>(0.778, 0.929) | Rdz: 0.659<br>(0.323, 0.848) |           |           |                                                                           |

| Left Caudate<br>cm3 | AIC    | BIC    | -2LL                       | df                           | DiffLL    | P value   | Results (95% CI)                                                    |
|---------------------|--------|--------|----------------------------|------------------------------|-----------|-----------|---------------------------------------------------------------------|
| ACE                 | 29.068 | 20.006 | 13.031                     | 7                            | Reference | Reference | A: 0.906 (0.482, 0.943)<br>C: 0 (0, 0.16)<br>E: 0.094 (0.057, 0.16) |
| AE*                 | 26.531 | 19.009 | 13.031                     | 6                            | 0         | 1         | A: 0.906 (0.84, 0.943)<br>C: 0<br>E: 0.094 (0.057, 0.16)            |
| CE                  | 52.686 | 45.164 | 39.186                     | 6                            | -26.155   | 0         | A: 0<br>C: 0.736 (0.599, 0.83)<br>E: 0.264 (0.17, 0.401)            |
| E                   | 99.353 | 93.282 | 88.3                       | 5                            | -75.269   | 0         | A: 0<br>C: 0<br>E: 1                                                |
| SAT                 | 36.355 | 22.087 | Rmz: 0.9<br>(0.823, 0.944) | Rdz: 0.442<br>(0.016, 0.736) |           |           |                                                                     |

| Right Pallidum<br>cm3 | AIC      | BIC      | -2LL                         | df                           | DiffLL    | P value   | Results (95% CI)                                                          |
|-----------------------|----------|----------|------------------------------|------------------------------|-----------|-----------|---------------------------------------------------------------------------|
| ACE                   | -233.753 | -242.815 | -249.789                     | 7                            | Reference | Reference | A: 0.834 (0.351, 0.941)<br>C: 0.069 (0, 0.163)<br>E: 0.097 (0.058, 0.163) |
| AE*                   | -236.253 | -243.775 | -249.753                     | 6                            | -0.036    | 0.85      | A: 0.903 (0.837, 0.941)<br>C: 0<br>E: 0.097 (0.059, 0.163)                |
| CE                    | -215.879 | -223.401 | -229.379                     | 6                            | -20.41    | 0         | A: 0<br>C: 0.787 (0.672, 0.865)<br>E: 0.213 (0.135, 0.328)                |
| E                     | -157.554 | -163.625 | -168.607                     | 5                            | -81.182   | 0         | A: 0<br>C: 0<br>E: 1                                                      |
| SAT                   | -227.225 | -241.493 | Rmz: 0.913<br>(0.846, 0.951) | Rdz: 0.432<br>(0.016, 0.721) |           |           |                                                                           |

| Left Pallidum<br>cm3 | AIC      | BIC      | -2LL    | df | DiffLL    | P value   | Results (95% CI)                                                    |
|----------------------|----------|----------|---------|----|-----------|-----------|---------------------------------------------------------------------|
| ACE                  | -198.684 | -207.746 | -214.72 | 7  | Reference | Reference | A: 0.926 (0.713, 0.956)<br>C: 0 (0, 0.13)<br>E: 0.074 (0.044, 0.13) |
| AE*                  | -201.220 | -208.742 | -214.72 | 6  | 0         | 1         | A: 0.926 (0.87, 0.956)<br>C: 0                                      |

|     |          |          |                              |                              |         |   |                                                            |
|-----|----------|----------|------------------------------|------------------------------|---------|---|------------------------------------------------------------|
|     |          |          |                              |                              |         |   | E: 0.074 (0.044, 0.13)                                     |
| CE  | -160.016 | -167.538 | -173.516                     | 6                            | -41.204 | 0 | A: 0<br>C: 0.614 (0.435, 0.746)<br>E: 0.386 (0.254, 0.565) |
| E   | -132.680 | -138.751 | -143.732                     | 5                            | -70.988 | 0 | A: 0<br>C: 0<br>E: 1                                       |
| SAT | -199.364 | -213.632 | Rmz: 0.904<br>(0.831, 0.946) | Rdz: 0.25<br>(-0.195, 0.613) |         |   |                                                            |

| Right Putamen<br>cm3 | AIC     | BIC     | -2LL                         | df                            | DiffLL    | P value   | Results (95% CI)                                                      |
|----------------------|---------|---------|------------------------------|-------------------------------|-----------|-----------|-----------------------------------------------------------------------|
| ACE                  | 50.606  | 41.544  | 34.57                        | 7                             | Reference | Reference | A: 0.898 (0.632, 0.939)<br>C: 0 (0, 0.177)<br>E: 0.102 (0.061, 0.177) |
| AE*                  | 48.070  | 40.548  | 34.57                        | 6                             | 0         | 1         | A: 0.898 (0.823, 0.939)<br>C: 0 (0, 1)<br>E: 0.102 (0.061, 0.177)     |
| CE                   | 79.053  | 71.531  | 65.553                       | 6                             | -30.983   | 0         | A: 0 (0, 1)<br>C: 0.653 (0.488, 0.774)<br>E: 0.347 (0.226, 0.512)     |
| E                    | 111.685 | 105.614 | 100.633                      | 5                             | -66.063   | 0         | A: 0 (0, 1)<br>C: 0 (0, 1)<br>E: 1 (0, 1)                             |
| SAT                  | 52.667  | 38.400  | Rmz: 0.898<br>(0.821, 0.943) | Rdz: 0.195<br>(-0.243, 0.568) |           |           |                                                                       |

| Left Putamen<br>cm3 | AIC     | BIC     | -2LL                         | df                           | DiffLL    | P value   | Results (95% CI)                                                      |
|---------------------|---------|---------|------------------------------|------------------------------|-----------|-----------|-----------------------------------------------------------------------|
| ACE                 | 106.219 | 97.157  | 90.183                       | 7                            | Reference | Reference | A: 0.951 (0.875, 0.971)<br>C: 0 (0, 0.071)<br>E: 0.049 (0.029, 0.071) |
| AE*                 | 103.683 | 96.161  | 90.183                       | 6                            | 0         | 1         | A: 0.951 (0.932, 0.971)<br>C: 0<br>E: 0.049 (0.029, 0.068)            |
| CE                  | 158.086 | 150.564 | 144.586                      | 6                            | -54.404   | 0         | A: 0<br>C: 0.42 (0.197, 0.602)<br>E: 0.58 (0.398, 0.803)              |
| E                   | 167.895 | 161.824 | 156.842                      | 5                            | -66.66    | 0         | A: 0<br>C: 0<br>E: 1                                                  |
| SAT                 | 79.481  | 65.214  | Rmz: 0.919<br>(0.857, 0.955) | Rdz: 0.017<br>(-0.41, 0.437) |           |           |                                                                       |

| Right Thalamus<br>cm3 | AIC     | BIC     | -2LL                        | df                           | DiffLL    | P value   | Results (95% CI)                                                         |
|-----------------------|---------|---------|-----------------------------|------------------------------|-----------|-----------|--------------------------------------------------------------------------|
| ACE                   | 193.987 | 184.925 | 177.951                     | 7                            | Reference | Reference | A: 0.07 (0, 0.642)<br>C: 0.673 (0.117, 0.404)<br>E: 0.257 (0.156, 0.404) |
| AE                    | 196.495 | 188.973 | 182.995                     | 6                            | -5.044    | 0.025     | A: 0.751 (0.61, 0.843)<br>C: 0<br>E: 0.249 (0.157, 0.39)                 |
| CE*                   | 191.564 | 184.042 | 178.064                     | 6                            | -0.113    | 0.737     | A: 0<br>C: 0.731 (0.593, 0.828)<br>E: 0.269 (0.172, 0.407)               |
| E                     | 237.340 | 231.269 | 226.287                     | 5                            | -48.336   | 0         | A: 0<br>C: 0<br>E: 1                                                     |
| SAT                   | 200.726 | 186.458 | Rmz: 0.741<br>(0.572, 0.85) | Rdz: 0.727<br>(0.434, 0.881) |           |           |                                                                          |

| Left Thalamus<br>cm3 | AIC     | BIC     | -2LL    | df | DiffLL    | P value   | Results (95% CI)                                                         |
|----------------------|---------|---------|---------|----|-----------|-----------|--------------------------------------------------------------------------|
| ACE*                 | 156.545 | 147.483 | 140.508 | 7  | Reference | Reference | A: 0.44 (0.127, 0.914)<br>C: 0.447 (0, 0.192)<br>E: 0.113 (0.067, 0.192) |
| AE                   | 156.599 | 149.077 | 143.099 | 6  | -2.591    | 0.108     | A: 0.886 (0.811, 0.93)<br>C: 0                                           |

|     |         |         |                              |                              |         |       |                                                          |
|-----|---------|---------|------------------------------|------------------------------|---------|-------|----------------------------------------------------------|
|     |         |         |                              |                              |         |       | E: 0.114 (0.07, 0.189)                                   |
| CE  | 162.840 | 155.318 | 149.34                       | 6                            | -8.832  | 0.003 | A: 0<br>C: 0.812 (0.71, 0.882)<br>E: 0.188 (0.118, 0.29) |
| E   | 227.829 | 221.758 | 216.776                      | 5                            | -76.268 | 0     | A: 0<br>C: 0<br>E: 1                                     |
| SAT | 163.022 | 148.755 | Rmz: 0.873<br>(0.778, 0.929) | Rdz: 0.724<br>(0.422, 0.881) |         |       |                                                          |

### volBrain Analysis

*AIC: akaike information criteria, BIC: bayesian information criteria, -2LL: -2\*loglikelihood value, df: degree of freedom, DiffLL: the difference of the -2LL of the base model (ACE) and the reduced model in the given row (AE/CE/E), P value: p value of the likelihood ratio test, best fitting model is marked with a star (\*).*

| TIV<br>cm3 | AIC       | BIC       | -2LL                         | df                           | DiffLL    | P value   | Results (95% CI)                                                      |
|------------|-----------|-----------|------------------------------|------------------------------|-----------|-----------|-----------------------------------------------------------------------|
| ACE        | 1,462.343 | 1,453.281 | 1446.306                     | 7                            | Reference | Reference | A: 0.934 (0.896, 0.956)<br>C: 0 (0, 0.104)<br>E: 0.066 (0.044, 0.104) |
| AE*        | 1,459.806 | 1,452.284 | 1446.306                     | 6                            | 0         | 1         | A: 0.934 (0.896, 0.956)<br>C: 0<br>E: 0.066 (0.044, 0.104)            |
| CE         | 1,499.379 | 1,491.857 | 1485.879                     | 6                            | -39.572   | 0         | A: 0<br>C: 0.728 (0.613, 0.825)<br>E: 0.272 (0.175, 0.387)            |
| E          | 1,544.482 | 1,538.412 | 1533.43                      | 5                            | -87.124   | 0         | A: 0<br>C: 0<br>E: 1                                                  |
| SAT        | 1,469.257 | 1,454.990 | Rmz: 0.929<br>(0.888, 0.952) | Rdz: 0.356<br>(-0.06, 0.636) |           |           |                                                                       |

| Total GM<br>cm3 | AIC       | BIC       | -2LL                         | df                            | DiffLL    | P value   | Results (95% CI)                                           |
|-----------------|-----------|-----------|------------------------------|-------------------------------|-----------|-----------|------------------------------------------------------------|
| ACE             | 1,261.700 | 1,252.638 | 1245.664                     | 7                             | Reference | Reference | A: 0.937 (0.9, 0.962)<br>C: 0<br>E: 0.063 (0.038, 0.1)     |
| AE*             | 1,259.164 | 1,251.642 | 1245.664                     | 6                             | 0         | 1         | A: 0.937 (0.9, 0.962)<br>C: 0<br>E: 0.063 (0.038, 0.1)     |
| CE              | 1,301.161 | 1,293.639 | 1287.661                     | 6                             | -41.998   | 0         | A: 0<br>C: 0.727 (0.611, 0.824)<br>E: 0.273 (0.176, 0.389) |
| E               | 1,346.079 | 1,340.008 | 1335.027                     | 5                             | -89.363   | 0         | A: 0<br>C: 0<br>E: 1                                       |
| SAT             | 1,268.324 | 1,254.057 | Rmz: 0.936<br>(0.886, 0.957) | Rdz: 0.268<br>(-0.159, 0.584) |           |           |                                                            |

| Total WM<br>cm3 | AIC       | BIC       | -2LL     | df | DiffLL    | P value   | Results (95% CI)                                                      |
|-----------------|-----------|-----------|----------|----|-----------|-----------|-----------------------------------------------------------------------|
| ACE             | 1,337.396 | 1,328.334 | 1321.36  | 7  | Reference | Reference | A: 0.881 (0.799, 0.921)<br>C: 0 (0, 0.201)<br>E: 0.119 (0.079, 0.201) |
| AE*             | 1,334.860 | 1,327.338 | 1321.36  | 6  | 0         | 1         | A: 0.881 (0.799, 0.921)<br>C: 0<br>E: 0.119 (0.079, 0.201)            |
| CE              | 1,355.013 | 1,347.491 | 1341.513 | 6  | -20.153   | 0         | A: 0<br>C: 0.719 (0.576, 0.799)<br>E: 0.281 (0.201, 0.424)            |
| E               | 1,398.390 | 1,392.319 | 1387.337 | 5  | -65.978   | 0         | A: 0<br>C: 0<br>E: 1                                                  |

|     |           |           |                             |                              |  |  |  |
|-----|-----------|-----------|-----------------------------|------------------------------|--|--|--|
| SAT | 1,345.189 | 1,330.922 | Rmz: 0.875<br>(0.805, 0.93) | Rdz: 0.418<br>(0.018, 0.673) |  |  |  |
|-----|-----------|-----------|-----------------------------|------------------------------|--|--|--|

| Total CSF<br>cm3 | AIC     | BIC     | -2LL                        | df                            | DiffLL    | P value   | Results (95% CI)                                                      |
|------------------|---------|---------|-----------------------------|-------------------------------|-----------|-----------|-----------------------------------------------------------------------|
| ACE              | -44.793 | -53.855 | -60.829                     | 7                             | Reference | Reference | A: 0.427 (0, 0.834)<br>C: 0.317 (0, 0.409)<br>E: 0.256 (0.158, 0.409) |
| AE*              | -46.745 | -54.267 | -60.245                     | 6                             | -0.584    | 0.445     | A: 0.744 (0.598, 0.839)<br>C: 0<br>E: 0.256 (0.161, 0.402)            |
| CE               | -44.954 | -52.476 | -58.454                     | 6                             | -2.375    | 0.123     | A: 0<br>C: 0.692 (0.538, 0.802)<br>E: 0.308 (0.198, 0.462)            |
| E                | -7.017  | -13.088 | -18.07                      | 5                             | -42.759   | 0         | A: 0<br>C: 0<br>E: 1                                                  |
| SAT              | -40.265 | -54.532 | Rmz: 0.79<br>(0.638, 0.883) | Rdz: 0.344<br>(-0.132, 0.705) |           |           |                                                                       |

| Right<br>Accumbens<br>cm3 | AIC      | BIC      | -2LL                        | df                             | DiffLL    | P value   | Results (95% CI)                                                    |
|---------------------------|----------|----------|-----------------------------|--------------------------------|-----------|-----------|---------------------------------------------------------------------|
| ACE                       | -404.850 | -414.058 | -420.924                    | 7                              | Reference | Reference | A: 0.694 (0.375, 0.82)<br>C: 0 (0, 0.515)<br>E: 0.306 (0.18, 0.515) |
| AE*                       | -407.396 | -415.039 | -420.924                    | 6                              | 0         | 1         | A: 0.694 (0.485, 0.82)<br>C: 0<br>E: 0.306 (0.18, 0.515)            |
| CE                        | -396.784 | -404.427 | -410.312                    | 6                              | -10.612   | 0.001     | A: 0<br>C: 0.453 (0.234, 0.628)<br>E: 0.547 (0.372, 0.766)          |
| E                         | -385.014 | -391.181 | -396.085                    | 5                              | -24.839   | 0         | A: 0<br>C: 0<br>E: 1                                                |
| SAT                       | -407.325 | -421.830 | Rmz: 0.724<br>(0.545, 0.84) | Rdz: -0.015<br>(-0.446, 0.424) |           |           |                                                                     |

| Left Accumbens<br>cm3 | AIC      | BIC      | -2LL                        | df                            | DiffLL    | P value   | Results (95% CI)                                                     |
|-----------------------|----------|----------|-----------------------------|-------------------------------|-----------|-----------|----------------------------------------------------------------------|
| ACE                   | -426.733 | -435.941 | -442.807                    | 7                             | Reference | Reference | A: 0.775 (0.49, 0.867)<br>C: 0 (0, 0.383)<br>E: 0.225 (0.133, 0.383) |
| AE*                   | -429.280 | -436.922 | -442.807                    | 6                             | 0         | 1         | A: 0.775 (0.617, 0.867)<br>C: 0<br>E: 0.225 (0.133, 0.383)           |
| CE                    | -413.905 | -421.547 | -427.432                    | 6                             | -15.375   | 0         | A: 0<br>C: 0.541 (0.341, 0.694)<br>E: 0.459 (0.306, 0.659)           |
| E                     | -394.859 | -401.027 | -405.931                    | 5                             | -36.876   | 0         | A: 0<br>C: 0<br>E: 1                                                 |
| SAT                   | -422.723 | -437.229 | Rmz: 0.787<br>(0.64, 0.879) | Rdz: -0.068<br>(-0.49, 0.384) |           |           |                                                                      |

| Right Amygdala<br>cm3 | AIC      | BIC      | -2LL     | df | DiffLL    | P value   | Results (95% CI)                                                     |
|-----------------------|----------|----------|----------|----|-----------|-----------|----------------------------------------------------------------------|
| ACE                   | -269.808 | -279.016 | -285.882 | 7  | Reference | Reference | A: 0.375 (0, 0.863)<br>C: 0.427 (0, 0.325)<br>E: 0.198 (0.12, 0.325) |
| AE*                   | -270.783 | -278.426 | -284.311 | 6  | -1.571    | 0.21      | A: 0.802 (0.682, 0.877)<br>C: 0<br>E: 0.198 (0.123, 0.318)           |
| CE                    | -269.277 | -276.920 | -282.805 | 6  | -3.077    | 0.079     | A: 0                                                                 |

|     |          |          |                            |                              |         |   |                                                  |
|-----|----------|----------|----------------------------|------------------------------|---------|---|--------------------------------------------------|
|     |          |          |                            |                              |         |   | C: 0.749 (0.617, 0.84)<br>E: 0.251 (0.16, 0.383) |
| E   | -220.753 | -226.920 | -231.824                   | 5                            | -54.057 | 0 | A: 0<br>C: 0<br>E: 1                             |
| SAT | -266.211 | -280.717 | Rmz: 0.825<br>(0.7, 0.901) | Rdz: 0.591<br>(0.207, 0.818) |         |   |                                                  |

| Left Amygdala<br>cm3 | AIC      | BIC      | -2LL                         | df                           | DiffLL    | P value   | Results (95% CI)                                                          |
|----------------------|----------|----------|------------------------------|------------------------------|-----------|-----------|---------------------------------------------------------------------------|
| ACE                  | -268.730 | -277.938 | -284.804                     | 7                            | Reference | Reference | A: 0.129 (0, 0.729)<br>C: 0.647 (0.064, 0.363)<br>E: 0.224 (0.136, 0.363) |
| AE                   | -266.948 | -274.590 | -280.475                     | 6                            | -4.329    | 0.037     | A: 0.777 (0.649, 0.86)<br>C: 0<br>E: 0.223 (0.14, 0.351)                  |
| CE*                  | -270.844 | -278.486 | -284.371                     | 6                            | -0.433    | 0.51      | A: 0<br>C: 0.756 (0.628, 0.845)<br>E: 0.244 (0.155, 0.372)                |
| E                    | -220.643 | -226.810 | -231.715                     | 5                            | -53.09    | 0         | A: 0<br>C: 0<br>E: 1                                                      |
| SAT                  | -262.435 | -276.941 | Rmz: 0.783<br>(0.635, 0.876) | Rdz: 0.712<br>(0.397, 0.879) |           |           |                                                                           |

| Right Caudate<br>cm3 | AIC     | BIC     | -2LL                         | df                           | DiffLL    | P value   | Results (95% CI)                                                        |
|----------------------|---------|---------|------------------------------|------------------------------|-----------|-----------|-------------------------------------------------------------------------|
| ACE                  | 85.548  | 76.340  | 69.474                       | 7                            | Reference | Reference | A: 0.553 (0.179, 0.92)<br>C: 0.328 (0, 0.202)<br>E: 0.12 (0.071, 0.202) |
| AE*                  | 84.022  | 76.379  | 70.494                       | 6                            | -1.02     | 0.313     | A: 0.878 (0.798, 0.926)<br>C: 0<br>E: 0.122 (0.074, 0.202)              |
| CE                   | 93.453  | 85.810  | 79.925                       | 6                            | -10.451   | 0.001     | A: 0<br>C: 0.798 (0.688, 0.873)<br>E: 0.202 (0.127, 0.312)              |
| E                    | 153.924 | 147.757 | 142.853                      | 5                            | -73.378   | 0         | A: 0<br>C: 0<br>E: 1                                                    |
| SAT                  | 92.944  | 78.439  | Rmz: 0.886<br>(0.799, 0.936) | Rdz: 0.588<br>(0.207, 0.816) |           |           |                                                                         |

| Left Caudate<br>cm3 | AIC     | BIC     | -2LL                         | df                          | DiffLL    | P value   | Results (95% CI)                                                         |
|---------------------|---------|---------|------------------------------|-----------------------------|-----------|-----------|--------------------------------------------------------------------------|
| ACE                 | 65.614  | 56.406  | 49.54                        | 7                           | Reference | Reference | A: 0.464 (0.156, 0.933)<br>C: 0.446 (0, 0.154)<br>E: 0.09 (0.054, 0.154) |
| AE*                 | 65.296  | 57.654  | 51.769                       | 6                           | -2.228    | 0.135     | A: 0.907 (0.845, 0.943)<br>C: 0<br>E: 0.093 (0.057, 0.155)               |
| CE                  | 74.578  | 66.936  | 61.051                       | 6                           | -11.511   | 0.001     | A: 0<br>C: 0.84 (0.749, 0.9)<br>E: 0.16 (0.1, 0.251)                     |
| E                   | 148.055 | 141.887 | 136.983                      | 5                           | -87.443   | 0         | A: 0<br>C: 0<br>E: 1                                                     |
| SAT                 | 72.947  | 58.442  | Rmz: 0.912<br>(0.843, 0.951) | Rdz: 0.677<br>(0.343, 0.86) |           |           |                                                                          |

| Right Pallidum<br>cm3 | AIC      | BIC      | -2LL     | df | DiffLL    | P value   | Results (95% CI)                                                          |
|-----------------------|----------|----------|----------|----|-----------|-----------|---------------------------------------------------------------------------|
| ACE                   | -166.406 | -175.614 | -182.48  | 7  | Reference | Reference | A: 0.515 (0.102, 0.899)<br>C: 0.332 (0, 0.253)<br>E: 0.153 (0.093, 0.253) |
| AE*                   | -168.154 | -175.796 | -181.681 | 6  | -0.799    | 0.371     | A: 0.844 (0.747, 0.904)<br>C: 0<br>E: 0.156 (0.096, 0.253)                |
| CE                    | -162.315 | -169.957 | -175.842 | 6  | -6.638    | 0.01      | A: 0                                                                      |

|     |          |          |                              |                              |         |   |                                                    |
|-----|----------|----------|------------------------------|------------------------------|---------|---|----------------------------------------------------|
|     |          |          |                              |                              |         |   | C: 0.781 (0.663, 0.861)<br>E: 0.219 (0.139, 0.337) |
| E   | -106.355 | -112.523 | -117.427                     | 5                            | -65.053 | 0 | A: 0<br>C: 0<br>E: 1                               |
| SAT | -160.074 | -174.580 | Rmz: 0.865<br>(0.766, 0.924) | Rdz: 0.491<br>(0.079, 0.761) |         |   |                                                    |

| Left Pallidum<br>cm3 | AIC      | BIC      | -2LL                        | df                           | DiffLL    | P value   | Results (95% CI)                                                         |
|----------------------|----------|----------|-----------------------------|------------------------------|-----------|-----------|--------------------------------------------------------------------------|
| ACE                  | -160.090 | -169.299 | -176.164                    | 7                            | Reference | Reference | A: 0.682 (0.21, 0.904)<br>C: 0.163 (0, 0.258)<br>E: 0.155 (0.094, 0.258) |
| AE*                  | -162.423 | -170.066 | -175.951                    | 6                            | -0.214    | 0.644     | A: 0.844 (0.745, 0.905)<br>C: 0<br>E: 0.156 (0.095, 0.255)               |
| CE                   | -152.695 | -160.338 | -166.223                    | 6                            | -9.942    | 0.002     | A: 0<br>C: 0.746 (0.612, 0.838)<br>E: 0.254 (0.162, 0.388)               |
| E                    | -104.819 | -110.986 | -115.89                     | 5                            | -60.274   | 0         | A: 0<br>C: 0<br>E: 1                                                     |
| SAT                  | -152.841 | -167.347 | Rmz: 0.85<br>(0.742, 0.915) | Rdz: 0.496<br>(0.083, 0.763) |           |           |                                                                          |

| Right Putamen<br>cm3 | AIC     | BIC     | -2LL                        | df                            | DiffLL    | P value   | Results (95% CI)                                                      |
|----------------------|---------|---------|-----------------------------|-------------------------------|-----------|-----------|-----------------------------------------------------------------------|
| ACE                  | 70.186  | 60.977  | 54.112                      | 7                             | Reference | Reference | A: 0.922 (0.674, 0.954)<br>C: 0 (0, 0.136)<br>E: 0.078 (0.046, 0.136) |
| AE*                  | 67.639  | 59.996  | 54.112                      | 6                             | 0         | 1         | A: 0.922 (0.864, 0.954)<br>C: 0<br>E: 0.078 (0.046, 0.136)            |
| CE                   | 106.391 | 98.749  | 92.864                      | 6                             | -38.752   | 0         | A: 0<br>C: 0.668 (0.504, 0.785)<br>E: 0.332 (0.215, 0.496)            |
| E                    | 140.554 | 134.387 | 129.483                     | 5                             | -75.371   | 0         | A: 0<br>C: 0<br>E: 1                                                  |
| SAT                  | 74.806  | 60.301  | Rmz: 0.915<br>(0.85, 0.953) | Rdz: 0.171<br>(-0.282, 0.563) |           |           |                                                                       |

| Left Putamen<br>cm3 | AIC     | BIC     | -2LL                         | df                            | DiffLL    | P value   | Results (95% CI)                                                      |
|---------------------|---------|---------|------------------------------|-------------------------------|-----------|-----------|-----------------------------------------------------------------------|
| ACE                 | 96.420  | 87.211  | 80.346                       | 7                             | Reference | Reference | A: 0.897 (0.629, 0.939)<br>C: 0 (0, 0.179)<br>E: 0.103 (0.061, 0.179) |
| AE*                 | 93.873  | 86.231  | 80.346                       | 6                             | 0         | 1         | A: 0.897 (0.821, 0.939)<br>C: 0<br>E: 0.103 (0.061, 0.179)            |
| CE                  | 124.479 | 116.836 | 110.951                      | 6                             | -30.606   | 0         | A: 0<br>C: 0.653 (0.485, 0.775)<br>E: 0.347 (0.225, 0.515)            |
| E                   | 156.491 | 150.324 | 145.42                       | 5                             | -65.074   | 0         | A: 0<br>C: 0<br>E: 1                                                  |
| SAT                 | 98.942  | 84.436  | Rmz: 0.894<br>(0.814, 0.941) | Rdz: 0.195<br>(-0.258, 0.577) |           |           |                                                                       |

| Right Thalamus<br>cm3 | AIC     | BIC     | -2LL    | df | DiffLL    | P value   | Results (95% CI)                                                      |
|-----------------------|---------|---------|---------|----|-----------|-----------|-----------------------------------------------------------------------|
| ACE                   | 170.963 | 161.755 | 154.889 | 7  | Reference | Reference | A: 0 (0, 0.272)<br>C: 0.716 (0.419, 0.429)<br>E: 0.284 (0.182, 0.429) |
| AE                    | 177.798 | 170.156 | 164.271 | 6  | -9.382    | 0.002     | A: 0.685 (0.523, 0.796)<br>C: 0<br>E: 0.315 (0.204, 0.477)            |
| CE*                   | 168.416 | 160.774 | 154.889 | 6  | 0         | 1         | A: 0                                                                  |



|     |         |         |                             |                             |         |   |                                                  |
|-----|---------|---------|-----------------------------|-----------------------------|---------|---|--------------------------------------------------|
|     |         |         |                             |                             |         |   | C: 0.716 (0.57, 0.817)<br>E: 0.284 (0.183, 0.43) |
| E   | 210.456 | 204.289 | 199.385                     | 5                           | -44.496 | 0 | A: 0<br>C: 0<br>E: 1                             |
| SAT | 174.572 | 160.066 | Rmz: 0.678<br>(0.479, 0.81) | Rdz: 0.825<br>(0.61, 0.927) |         |   |                                                  |

| Left Thalamus<br>cm3 | AIC     | BIC     | -2LL                        | df                           | DiffLL    | P value   | Results (95% CI)                                                         |
|----------------------|---------|---------|-----------------------------|------------------------------|-----------|-----------|--------------------------------------------------------------------------|
| ACE                  | 125.154 | 115.946 | 109.08                      | 7                            | Reference | Reference | A: 0.11 (0, 0.485)<br>C: 0.762 (0.484, 0.218)<br>E: 0.128 (0.076, 0.218) |
| AE                   | 132.179 | 124.537 | 118.652                     | 6                            | -9.572    | 0.002     | A: 0.87 (0.789, 0.919)<br>C: 0<br>E: 0.13 (0.081, 0.211)                 |
| CE*                  | 123.507 | 115.865 | 109.98                      | 6                            | -0.9      | 0.343     | A: 0<br>C: 0.854 (0.77, 0.909)<br>E: 0.146 (0.091, 0.23)                 |
| E                    | 202.015 | 195.848 | 190.943                     | 5                            | -81.864   | 0         | A: 0<br>C: 0<br>E: 1                                                     |
| SAT                  | 129.335 | 114.830 | Rmz: 0.862<br>(0.76, 0.922) | Rdz: 0.862<br>(0.685, 0.943) |           |           |                                                                          |
